# Supplementary material for: What Works? Prevention and Control of Sexually Transmitted Infections and Blood-Borne Viruses in Migrants from Sub-Saharan Africa, Northeast Asia and Southeast Asia Living in High-Income Countries: A Systematic Review
Source: PubMed Central journal article supplement (PMC6480002; doi:10.3390/ijerph16071287), 2019-04-10
Supplement: ijerph-16-01287-s001.pdf [file ijerph-16-01287-s001.pdf]

## **Supplementary Materials: What works? Prevention and control of sexually transmitted infections and blood borne viruses in migrants from sub-Saharan Africa, North East Asia and South East Asia living in high-income countries: A systematic review**

**Sajana Ghimire, Jonathan Hallett, Corie Gray, Roanna Lobo, Gemma Crawford**

Table S1. Data Extraction Summary.

Notes: CALD=culturally and linguistically diverse, CHB=chronic hepatitis B, GP = general practitioner, NA= not applicable, NR=not reported, OR=odds ratio, PLHIV=people living with HIV, SSA=sub-Saharan Africa, STI=sexually transmitted infection, TG=target group

| Study Characteristics                                                                                                                                                                                                                                                                                                                                                                                                                                                                                                                  | Intervention                                                                                                                                                                                                                                                                       | Evaluation Design/Methods                                                                                                                                                                                                                                                                                                                                                                                                                                       | Sample/Response                                                                                                     | Outcomes                                                                                                                                                                                                                                                                                                                                                                                         |
|----------------------------------------------------------------------------------------------------------------------------------------------------------------------------------------------------------------------------------------------------------------------------------------------------------------------------------------------------------------------------------------------------------------------------------------------------------------------------------------------------------------------------------------|------------------------------------------------------------------------------------------------------------------------------------------------------------------------------------------------------------------------------------------------------------------------------------|-----------------------------------------------------------------------------------------------------------------------------------------------------------------------------------------------------------------------------------------------------------------------------------------------------------------------------------------------------------------------------------------------------------------------------------------------------------------|---------------------------------------------------------------------------------------------------------------------|--------------------------------------------------------------------------------------------------------------------------------------------------------------------------------------------------------------------------------------------------------------------------------------------------------------------------------------------------------------------------------------------------|
| <p><b>McMahon et al. (2004) [42]</b><br/>Ethnic media campaign on patterns of HIV testing among people from CALD communities<br/><b>Objectives:</b></p> <ul style="list-style-type: none"> <li>• Inform TGs of availability of free and anonymous HIV testing and benefits of early diagnosis;</li> <li>• Raise awareness in TG about current HIV/AIDS issues; and</li> <li>• Promote access by people living with HIV/AIDS from CALD backgrounds to treatment and care services.</li> </ul> <p><b>Location:</b> Sydney, Australia</p> | <p><b>Community level</b><br/><b>Educational methods</b><br/><b>Strategies/Activities:</b> Printed resources in multiple languages and radio media to inform TG of availability of free HIV testing services and benefit of early diagnosis</p>                                    | <p><b>Length:</b> 1 month<br/><b>Design/Method:</b> Quasi-experimental; Comparison of number of HIV tests among TG between 1999 and 2000, and pre- and post-campaign periods in 2000 for three sexual health centers.<br/><b>Measures:</b> Number of HIV tests<br/><b>Participants:</b> CALD migrants (undefined) Comparison group: Other patients for HIV test<br/><b>Recruitment:</b><br/><b>Age:</b> &gt;18 years<br/><b>Ethics approval:</b> NR</p>         | <p><b>Sample:</b> n=1067 (pre, post campaign); n=545 (comparison).<br/><b>Response:</b> 99% (n= 13 dropped out)</p> | <ul style="list-style-type: none"> <li>• Increased HIV tests pre- (16.3%) to post- campaign (18.8%) though not statistically significant (<math>p=0.31</math>)</li> <li>• Increase in proportion of HIV testing (10.5%, <math>p&lt;0.01</math>)</li> </ul>                                                                                                                                       |
| <p><b>Worth et al. (2003) [43]</b><br/>The New Zealand HIV/AIDS refugee education program<br/><b>Objective:</b> Change attitudes and beliefs towards PLHIV and misconceptions associated with sexually transmitted infections.<br/><b>Location:</b> Auckland, New Zealand</p>                                                                                                                                                                                                                                                          | <p><b>Community level</b><br/><b>Educational methods</b><br/><b>Strategies/Activities:</b> HIV/AIDS health promotion training and support for refugee communities; resource development; service provider training and support; and development of support networks for PLHIV.</p> | <p><b>Length:</b> NR<br/><b>Design/Method:</b> Process evaluation<br/><b>Measures:</b> NR<br/><b>Participants:</b> Newly arrived male and female HIV positive African refugees.<br/><b>Recruitment:</b> Via community-based organizations.<br/><b>Age:</b> 20–35 years<br/><b>Ethics approval:</b> NR</p>                                                                                                                                                       | <p><b>Sample:</b> n=15; 10 females and 5 males<br/><b>Response:</b> 100%</p>                                        | <ul style="list-style-type: none"> <li>• Increased understanding, acceptance and active participation in project.</li> <li>• Increased request for spiritual support and counseling for PLHIV and their family members.</li> </ul>                                                                                                                                                               |
| <p><b>Esteban-Vasallo et al. (2014) [44]</b><br/>Targeted rapid HIV testing and consultation in public primary care services in Madrid<br/><b>Objectives:</b> Increase knowledge of HIV serostatus among people who belong to groups disproportionately affected by HIV.<br/><b>Location:</b> Madrid, Spain</p>                                                                                                                                                                                                                        | <p><b>Individual level</b><br/><b>Biomedical and education methods</b><br/><b>Strategies/Activities:</b> Counseling and rapid HIV testing offered from seven primary care services.</p>                                                                                            | <p><b>Length:</b> 2 years<br/><b>Design/Method:</b> Descriptive cross-sectional.<br/><b>Measures:</b> Number of HIV tests, test results and participant characteristics.<br/><b>Participants:</b> Immigrants, sex workers, heterosexual men and MSM.<br/><b>Recruitment:</b> Outreach work conducted with cultural mediators; mass media advertisement; and posters and brochures distribution.<br/><b>Age:</b> &gt;18 years<br/><b>Ethics approval:</b> NR</p> | <p><b>Sample:</b> n=1940 all study population; n=687 immigrants<br/><b>Response:</b> 94% (n=114 dropped out)</p>    | <ul style="list-style-type: none"> <li>• HIV testing services used by large number of MSM and immigrants</li> <li>• Higher proportion of immigrants from SEA tested for first time (<math>p&lt;0.05</math>) (OR 16.42, 95% CI 2.08-129.88)</li> <li>• Increased proportion of testing among those with no casual sexual partners (OR 1.49) and with no history of any STIs (OR 1.93).</li> </ul> |

| Study Characteristics                                                                                                                                                                                                                                                                                                                                                                                                                                                                                            | Intervention                                                                                                                                                                                                                                                                                                                                     | Evaluation Design/Methods                                                                                                                                                                                                                                                                                                                                                                                                                                                                                                                                                                                                                                    | Sample/Response                                                                                                | Outcomes                                                                                                                                                                                                                                                                                                                                                                                                                              |
|------------------------------------------------------------------------------------------------------------------------------------------------------------------------------------------------------------------------------------------------------------------------------------------------------------------------------------------------------------------------------------------------------------------------------------------------------------------------------------------------------------------|--------------------------------------------------------------------------------------------------------------------------------------------------------------------------------------------------------------------------------------------------------------------------------------------------------------------------------------------------|--------------------------------------------------------------------------------------------------------------------------------------------------------------------------------------------------------------------------------------------------------------------------------------------------------------------------------------------------------------------------------------------------------------------------------------------------------------------------------------------------------------------------------------------------------------------------------------------------------------------------------------------------------------|----------------------------------------------------------------------------------------------------------------|---------------------------------------------------------------------------------------------------------------------------------------------------------------------------------------------------------------------------------------------------------------------------------------------------------------------------------------------------------------------------------------------------------------------------------------|
| <p><b>Bartelsman et al. (2017) [45]</b><br/>HIV testing week: lowering barriers for HIV testing among high-risk groups in Amsterdam</p> <p><b>Objectives:</b></p> <ul style="list-style-type: none"> <li>• Create awareness by emphasizing the importance of early testing among both professionals and inhabitants of Amsterdam, and</li> <li>• To normalize and increase proactive HIV testing and the detection of new HIV infections.</li> </ul> <p><b>Location:</b> Amsterdam, Netherlands</p>              | <p><b>Individual level</b><br/><b>Biomedical and education methods</b><br/><b>Strategies/Activities:</b></p> <ul style="list-style-type: none"> <li>• Anonymous HIV rapid testing offered free of charge at various clinical and non-clinical healthcare locations</li> <li>• Home-based testing was provided through online services</li> </ul> | <p><b>Length:</b> 1 week<br/><b>Design/Method:</b> Quasi-experimental.<br/><b>Measures:</b> Number of HIV tests, HIV positivity, participant characteristics and location of test.<br/><b>Participants:</b> MSM and non-Western migrants<br/><b>Recruitment:</b> Online marketing and advertising; flyers and posters distributed at locations and via outreach; newspaper, radio and television broadcasts; and a website to provide information about testing week and locations of services.<br/><b>Age:</b> &gt;18 years<br/><b>Ethics approval:</b> Yes</p>                                                                                             | <p><b>Sample:</b> n=1231<br/><b>Response:</b> NA</p>                                                           | <ul style="list-style-type: none"> <li>• 32.7% received HIV test for the first time. 35% had tested more than a year before.</li> <li>• For first- and second-generation non-Western migrants tested for the first time (27.2% and 33.5%, respectively, <math>p &lt; 0.01</math>)</li> </ul>                                                                                                                                          |
| <p><b>Stornaiuolo et al. (2014) [46]</b><br/>Active recruitment strategy in disadvantaged immigrant populations improves the identification of HIV but not of hepatitis B or C virus infections</p> <p><b>Objectives:</b></p> <ul style="list-style-type: none"> <li>• Evaluate the prevalence of HIV, HBV, and HCV;</li> <li>• Explore the factors associated with the infections; and</li> <li>• Compare an active system of recruitment with a passive one.</li> </ul> <p><b>Location:</b> Caserta, Italy</p> | <p><b>Individual level</b><br/><b>Biomedical and education methods</b><br/><b>Strategies/Activities:</b> Screening test was offered to all participants attending a mobile health unit and outpatients from health-related services and family counseling.</p>                                                                                   | <p><b>Length:</b> 10 years<br/><b>Design/Method:</b> Cross sectional, comparison between two phases of the recruitment process.<br/><b>Measures:</b> Number of HIV tests, HIV, HBV and HCV positivity and participant characteristics.<br/><b>Participants:</b> Migrants mostly from SSA and Asia<br/><b>Recruitment:</b></p> <ul style="list-style-type: none"> <li>• 1999-2004: Active recruitment through mobile unit in addition to outpatients from health-related services and family counseling</li> <li>• 2005-2009: Recruitment via outpatients from the medical center.</li> </ul> <p><b>Age:</b> &gt;18 years<br/><b>Ethics approval:</b> Yes</p> | <p><b>Sample:</b> n=2681 all study population; n= 2202 SSA; n=115 Asia<br/><b>Response:</b> &gt;90% (n=NR)</p> | <ul style="list-style-type: none"> <li>• High testing acceptance rate (&gt;90%).</li> <li>• No significant difference in prevalence of HBV or HCV. HIV infection significantly associated with active recruitment (<math>p &lt; 0.05</math>).</li> <li>• For those from SSA, 8.1% were diagnosed with HBV, 2.5% with HCV and 5.4% with HIV.</li> <li>• For those from Asia, 3.5 % were diagnosed with HCV and 1% with HIV.</li> </ul> |

|                                                                                                                                                                                                                                                                                                                                                     |                                                                                                                                                                                                                                                         |                                                                                                                                                                                                                                                                                                                                                                                                                                                                                       |                                                                                                                |                                                                                                                                                                                                                                                                                                                                                                                                                                                                                                    |
|-----------------------------------------------------------------------------------------------------------------------------------------------------------------------------------------------------------------------------------------------------------------------------------------------------------------------------------------------------|---------------------------------------------------------------------------------------------------------------------------------------------------------------------------------------------------------------------------------------------------------|---------------------------------------------------------------------------------------------------------------------------------------------------------------------------------------------------------------------------------------------------------------------------------------------------------------------------------------------------------------------------------------------------------------------------------------------------------------------------------------|----------------------------------------------------------------------------------------------------------------|----------------------------------------------------------------------------------------------------------------------------------------------------------------------------------------------------------------------------------------------------------------------------------------------------------------------------------------------------------------------------------------------------------------------------------------------------------------------------------------------------|
| <p><b>Drummond et al. (2011) [47]</b><br/>Using peer education to increase sexual health knowledge<br/><b>Objectives:</b> Create awareness on STIs and BBVs and address misconception about how HIV is transmitted.<br/><b>Location:</b> Perth, Australia</p>                                                                                       | <p><b>Community level</b><br/><b>Educational methods</b><br/><b>Strategies/Activities:</b> 10 peer educators undertook 9 hours of training on sexual health. Peer educators worked in pairs or groups to conduct workshops with 10-15 participants.</p> | <p><b>Length:</b> NR<br/><b>Design/Method:</b> Quasi experimental, pre-test and post-test evaluation<br/><b>Measures:</b> Knowledge of STIs and HIV transmission and attitude towards condom use.<br/><b>Participants:</b> West African refugees<br/><b>Recruitment:</b> Via peer educators<br/><b>Age</b> &gt;16 years<br/><b>Ethics approval:</b> Yes</p>                                                                                                                           | <p><b>Sample:</b> n=58 post-test respondents<br/><b>Response:</b> 100%</p>                                     | <ul style="list-style-type: none"> <li>• Six of seven knowledge categories increased significantly.</li> <li>• No significant difference in attitudes towards condom use.</li> </ul>                                                                                                                                                                                                                                                                                                               |
| <p><b>Roberts et al. (2017) [48]</b><br/>Sharing stories youth theatre program for sexual health promotion<br/><b>Objectives:</b> Increase STI and BBV knowledge and the uptake of harm minimization strategies<br/><b>Setting:</b> Perth, Australia</p>                                                                                            | <p><b>Community level</b><br/><b>Educational methods</b><br/><b>Strategies/Activities:</b> Theatre, filmmaking, art and drama used to empower communities to become peer educators to discuss sexual health education.</p>                              | <p><b>Length:</b> 12 weeks<br/><b>Design/Method:</b> Mixed methods, pre-test and post-test evaluation.<br/><b>Measures:</b> Confidence talking about sexual health; in seeking STI testing; knowledge of where to access information and where to go for STI testing; and positive attitudes towards carrying condoms.<br/><b>Participants:</b> Young people from SEA, SSA and Middle East<br/><b>Recruitment:</b><br/><b>Age:</b> 14 to 21 years<br/><b>Ethics approval:</b> Yes</p> | <p><b>Sample:</b> n=18 pre and n=15 post<br/><b>Response:</b> 83% (n=3 non-attendance for post evaluation)</p> | <ul style="list-style-type: none"> <li>• Increased confidence talking about sexual health with friends and in seeking testing after unprotected sex. However, confidence talking about sexual health with family members did not increase.</li> <li>• Increased knowledge of STIs, places to assess accurate information about sexual health and to receive sexual health services.</li> <li>• Increase in positive attitudes towards carrying condoms and asking partners to use them.</li> </ul> |
| <p><b>Zencovich et al. (2006) [49]</b><br/>Immigration medical screening and HIV infection for health promotion and infectious disease prevention<br/><b>Objectives:</b> Introduced mandatory HIV testing and counselling in 2001 to mitigate public health risk of HIV and for health protection of the applicant.<br/><b>Location:</b> Canada</p> | <p><b>Structural level</b><br/><b>Biomedical and educational methods</b><br/><b>Strategies/Activities:</b> Mandatory HIV testing of permanent residency applicants.</p>                                                                                 | <p><b>Length:</b> 2 years<br/><b>Design/Method:</b> Cross-sectional<br/><b>Measures:</b> HIV positivity and participant characteristics.<br/><b>Participants:</b> All applicants for permanent residency.<br/><b>Recruitment:</b> NA<br/><b>Age:</b> &gt;15 years<br/><b>Ethics Approval:</b> NR</p>                                                                                                                                                                                  | <p><b>Sample:</b> n=634,958<br/><b>Response:</b> NA</p>                                                        | <ul style="list-style-type: none"> <li>• 932 cases diagnosed with HIV (441 women, 491 men). Median age was 34 years.</li> <li>• Of diagnosed cases, 67% were from Africa, 22% America, 7% from Asia and remaining 5% from other countries.</li> <li>• 36% were refugees and 34% refugee claimants.</li> </ul>                                                                                                                                                                                      |

| Study Characteristics                                                                                                                                                                                                                                                                                                                                                                                 | Intervention                                                                                                                                                                                                                                                                    | Evaluation Design/Methods                                                                                                                                                                                                                                                                                                                                                                                                                                                                                | Sample/Response                                                                                                                               | Outcomes                                                                                                                                                                                                                                                                                                                                                                                                                     |
|-------------------------------------------------------------------------------------------------------------------------------------------------------------------------------------------------------------------------------------------------------------------------------------------------------------------------------------------------------------------------------------------------------|---------------------------------------------------------------------------------------------------------------------------------------------------------------------------------------------------------------------------------------------------------------------------------|----------------------------------------------------------------------------------------------------------------------------------------------------------------------------------------------------------------------------------------------------------------------------------------------------------------------------------------------------------------------------------------------------------------------------------------------------------------------------------------------------------|-----------------------------------------------------------------------------------------------------------------------------------------------|------------------------------------------------------------------------------------------------------------------------------------------------------------------------------------------------------------------------------------------------------------------------------------------------------------------------------------------------------------------------------------------------------------------------------|
| <p><b>Van Gemert et al. (2016) [50]</b><br/> Identification of priority populations to increase hepatitis B testing rates, 2012<br/> <b>Objectives:</b> Identify people at increased risk of HBV and increase HBV testing and HBV vaccination in these populations.<br/> <b>Location:</b> Melbourne, Australia</p>                                                                                    | <p><b>Individual level</b><br/> <b>Biomedical and education methods</b><br/> <b>Strategies/Activities:</b> Implementation of a system for identification of high-risk populations and a call back system to increase hepatitis B testing and vaccination where appropriate.</p> | <p><b>Length of time:</b> 4 months<br/> <b>Study design:</b> Pre-post intervention<br/> <b>Measures:</b> HBV test and uptake of HBV vaccination.<br/> <b>Participants:</b> Asian born patients, Aboriginal and/or Torres Strait Islander people and people with a history of injecting drugs who had not tested for HBV or had tested and were HBV susceptible.<br/> <b>Recruitment:</b> Mailed letters and/or phone calls from clinics.<br/> <b>Age:</b> ≥18 years<br/> <b>Ethics approval:</b> Yes</p> | <p><b>Sample:</b> n=338<br/> <b>Response:</b> n=4 (1%)</p>                                                                                    | <ul style="list-style-type: none"> <li>• 21.6% (n=73) of invited patients had a subsequent consultation with a general practitioner.</li> <li>• Four patients tested for HBV, and one tested positive for CHB. Remaining three patients not vaccinated.</li> </ul>                                                                                                                                                           |
| <p><b>Dokkum et al. (2012) [51]</b><br/> Keeping participants on board: Increasing uptake by automated respondent reminders in an internet-based Chlamydia screening<br/> <b>Objectives:</b> Assess whether annual systematic, selective screening can reduce population prevalence of <i>Chlamydia trachomatis</i> (Ct) and prevent serious complications.<br/> <b>Location:</b> The Netherlands</p> | <p><b>Individual level</b><br/> <b>Biomedical</b><br/> <b>Strategies/Activities:</b> Screening procedure consisted of five steps: invitation, request of home testing kits, home sampling, sample return and checking the test result.</p>                                      | <p><b>Length of time:</b> First round April 2008, second round started from 2009.<br/> <b>Design/Method:</b> Intervention<br/> <b>Measures:</b> Response rate (% of package requests) and participation rate (% of sample return).<br/> <b>Participants:</b> All 16-29 year-olds<br/> <b>Recruitment:</b> An invitation letter, a reminder letter, two emails and an SMS.<br/> <b>Age:</b> 16 to 29 years<br/> <b>Ethics approval:</b> Yes</p>                                                           | <p><b>Sample:</b> Round 1: n=256,400<br/> Round 2: n=301,600<br/> <b>Response:</b> Round 1: 21% (n=52,628).<br/> Round 2: 14% (n=41,729).</p> | <ul style="list-style-type: none"> <li>• Package requests were 21% and 14% and returned samples 16% and 11.5% in round 1 and 2 respectively.</li> <li>• 41% and 42% of participants requested the package after a reminder letter, significant for round 1 (p=0.0001). 79% and 82% returned the sample.</li> <li>• SSA ethnicity associated with requesting the package after a reminder letter (OR (95%CI): 1.4)</li> </ul> |
| <p><b>Ackerman et al. (2018) [52]</b><br/> Mandatory screening for infectious diseases among newly arrived asylum seekers, Bavaria, Germany, 2015.<br/> <b>Objectives:</b> Assess the results of the mandatory screening procedures for HIV infection, hepatitis B and other diseases among asylum seekers.<br/> <b>Location:</b> Bavaria, Germany</p>                                                | <p><b>Individual level</b><br/> <b>Biomedical</b><br/> <b>Strategies/Activities:</b> Data were extracted from the mandatory notification and laboratory information system. Demographic data captured via interviews for registration with local health authorities.</p>        | <p><b>Length of time:</b> Not reported<br/> <b>Design/Method:</b> Cross-sectional<br/> <b>Measures:</b> Serological screening of HIV and HBV<br/> <b>Participants:</b> Asylum seekers undertaking HIV screening who originated from high risk countries<br/> <b>Recruitment:</b><br/> <b>Age:</b> ≥15 years<br/> <b>Ethics approval:</b> NR</p>                                                                                                                                                          | <p><b>Sample:</b> n=95117<br/> <b>Response:</b> NA</p>                                                                                        | <ul style="list-style-type: none"> <li>• 0.3% tested positive for HIV. 58% were male and 15.8% female. 24.5% were in between the age group of 15-24 years. 71.4% of total cases originated from SSA</li> <li>• 3.3 % of cases indicated HBV. Highest positivity found in asylum seekers from Sierra Leone, Senegal and Mali (17.6%, 16.2%, and 15.4%, respectively).</li> </ul>                                              |

| Study Characteristics                                                                                                                                                                                                                                                                                                                                                                                                                 | Intervention                                                                                                                                                                                                                                                                 | Evaluation Design/Methods                                                                                                                                                                                                                                                                                                                                                                                                                                                                                                                                 | Sample/Response                                                                                                           | Outcomes                                                                                                                                                                                                                                                                                                                                                                                                                                                                         |
|---------------------------------------------------------------------------------------------------------------------------------------------------------------------------------------------------------------------------------------------------------------------------------------------------------------------------------------------------------------------------------------------------------------------------------------|------------------------------------------------------------------------------------------------------------------------------------------------------------------------------------------------------------------------------------------------------------------------------|-----------------------------------------------------------------------------------------------------------------------------------------------------------------------------------------------------------------------------------------------------------------------------------------------------------------------------------------------------------------------------------------------------------------------------------------------------------------------------------------------------------------------------------------------------------|---------------------------------------------------------------------------------------------------------------------------|----------------------------------------------------------------------------------------------------------------------------------------------------------------------------------------------------------------------------------------------------------------------------------------------------------------------------------------------------------------------------------------------------------------------------------------------------------------------------------|
| <p><b>Li et al. (2018) [53]</b><br/>Effects of HIV stigma reduction interventions in diasporic communities: insight from the CHAMP project<br/><b>Objectives:</b> Assess the effectiveness of two group interventions, Acceptance and Commitment Therapy/Training (ACT) and Social Justice Capacity Building (SJCBC), in reducing HIV stigma and mobilizing champions to address HIV stigma.<br/><b>Location:</b> Toronto, Canada</p> | <p><b>Community level Educational</b><br/><b>Strategies/Activities:</b> Random assignment to four half-day training sessions of ACT or ACT and SJCBC.</p>                                                                                                                    | <p><b>Length of time:</b> 1 year<br/><b>Design/Method:</b> Pre-post intervention<br/><b>Measures:</b> Enacted and internalized HIV stigma, and HIV champion readiness.<br/><b>Participants:</b> PLHIV and community leaders of diasporic communities.<br/><b>Recruitment:</b> Outreach to community organizations, advertisements in local (ethnic) media, and presentations in the communities.<br/><b>Age:</b> ≥18 years<br/><b>Ethics approval:</b> Yes</p>                                                                                            | <p><b>Sample:</b> n=63 PLHIV; n=42 community leaders<br/><b>Response:</b> 63% (n=28 PLHIV and n=11 community leaders)</p> | <ul style="list-style-type: none"> <li>• Significantly decreased internalized stigma and stigma against HIV/AIDS.</li> <li>• Speaking out in social situations, feeling knowledgeable, confident to talk, engage others to fight for justice and mobilize networks were significantly increased after the intervention (p&lt;0.01)</li> <li>• Participants reported 1090 championship activities to advocate for HIV related health equity and social justice issues.</li> </ul> |
| <p><b>Fрати et al. (2017) [54]</b><br/>A novel screening strategy for improving women's health in vulnerable populations.<br/><b>Objectives:</b> Evaluate an STI screening and measure prevalence of STIs among undocumented migrant women.<br/><b>Location:</b> Milan, Italy</p>                                                                                                                                                     | <p><b>Individual level Biomedical and educational methods</b><br/><b>Strategies/Activities:</b> Implemented a counseling and preventive strategy for STIs. Collection of urine sample for the analysis of STIs.</p>                                                          | <p><b>Length of time:</b> 18 months<br/><b>Design/Method:</b> Cross sectional<br/><b>Measures:</b> STI test uptake, STI positivity and participant characteristics.<br/><b>Participants:</b> Undocumented migrant women attending a migrant centre<br/><b>Recruitment:</b><br/><b>Age:</b> ≥18 years<br/><b>Ethics approval:</b> Yes</p>                                                                                                                                                                                                                  | <p><b>Sample:</b> n= 757<br/><b>Response:</b> 71% (n=537)</p>                                                             | <ul style="list-style-type: none"> <li>• Acceptability rate for screening among participants was high (70.9%).</li> <li>• 24.2% indicated HPV DNA positive sample.</li> <li>• Of total positive cases, only 43.2% agreed to undergo further investigation.</li> </ul>                                                                                                                                                                                                            |
| <p><b>Anderson et al. (2016) [55]</b><br/>Impact of criminalization of in call venues and managers on migrant sex workers access to HIV/STI prevention<br/><b>Objectives:</b> Investigate the health and safety impact of sex work laws that criminalize managers and other third-party actors who work in in-call sex work establishments.<br/><b>Location:</b> Vancouver, Canada</p>                                                | <p><b>Structural level</b><br/><b>Strategies/Activities:</b> New legislation that criminalizes sex buyers, the advertisement of sexual services and third-party actors who materially benefit in the context of a commercial enterprise was introduced in December 2014.</p> | <p><b>Length:</b> Three years<br/><b>Design/Method:</b> Qualitative using key informant in-depth interview<br/><b>Measures:</b> Experiences in the sex industry, interactions with police, city officials, co-workers, managers and owners, and access to condoms, education, training and outreach services.<br/><b>Participants:</b> Asian migrant sex workers, managers and business owners of in call sex work sites.<br/><b>Recruitment:</b> Outreach to in-call venues and online.<br/><b>Age:</b> &gt;18 years<br/><b>Ethics approval:</b> Yes</p> | <p><b>Sample:</b> n=46<br/><b>Response:</b> NA</p>                                                                        | <ul style="list-style-type: none"> <li>• Police and immigration raids on in-call venues and the criminalization of managers severely restrict migrant sex workers' access to condoms, health outreach services, HIV/STI testing and sexual health education.</li> </ul>                                                                                                                                                                                                          |

| Study Characteristics                                                                                                                                                                                                                                                                                                                                                                                                                     | Intervention                                                                                                                                                                                                                 | Evaluation Design/Methods                                                                                                                                                                                                                                                                                                                                                                                                              | Sample/Response                                                                                                                             | Outcomes                                                                                                                                                                                                                                                                                                                                                                                                                                    |
|-------------------------------------------------------------------------------------------------------------------------------------------------------------------------------------------------------------------------------------------------------------------------------------------------------------------------------------------------------------------------------------------------------------------------------------------|------------------------------------------------------------------------------------------------------------------------------------------------------------------------------------------------------------------------------|----------------------------------------------------------------------------------------------------------------------------------------------------------------------------------------------------------------------------------------------------------------------------------------------------------------------------------------------------------------------------------------------------------------------------------------|---------------------------------------------------------------------------------------------------------------------------------------------|---------------------------------------------------------------------------------------------------------------------------------------------------------------------------------------------------------------------------------------------------------------------------------------------------------------------------------------------------------------------------------------------------------------------------------------------|
| <p><b>Uccella et al. (2017) [56]</b><br/>HIV rapid testing in the framework of an STI prevention project</p> <p><b>Objectives:</b></p> <ul style="list-style-type: none"> <li>• Evaluate the acceptability of HIV rapid test and estimate the percentage of newly HIV diagnoses.</li> <li>• Evaluate knowledge, attitudes and perception about HIV and other STIs among migrants in Italy.</li> </ul> <p><b>Location:</b> Rome, Italy</p> | <p><b>Individual level</b><br/><b>Biomedical and educational methods</b></p> <p><b>Strategies/Activities:</b> Rapid testing for HIV (free) with pre- and post-test counselling provided by trained health professionals.</p> | <p><b>Length:</b> 12 months</p> <p><b>Design/Method:</b> Intervention with pre- and post-survey</p> <p><b>Measures:</b> Acceptability of HIV rapid test; number of new HIV diagnoses and knowledge, attitudes and perception of HIV/AIDS and other STIs.</p> <p><b>Participants:</b> Attendants at an infectious disease clinic.</p> <p><b>Recruitment:</b> NR</p> <p><b>Age:</b> 16 to 70 years</p> <p><b>Ethics approval:</b> NR</p> | <p><b>Sample:</b> n=832</p> <p><b>Response:</b> 99% (n=825)</p> <p>Pre-test survey: 46.8% (n=385)</p> <p>Post-test survey: 15.1% (n=50)</p> | <ul style="list-style-type: none"> <li>• Acceptability rate of the HIV rapid test high. 68.7% of participants were first time testers (71.4% immigrants). 10 individuals diagnosed with HIV.</li> <li>• 89% of participants were migrants, 19.6% and 13.6% were from Africa and Asia.</li> <li>• Poor knowledge about HIV and STIs were found significantly associated with migrants and participants with low education levels.</li> </ul> |
| <p><b>Veldhuijzen et al. (2012) [57]</b><br/>Identification and treatment of chronic hepatitis B in Chinese migrants.</p> <p><b>Objective:</b> To measure the impact of screening program for chronic hepatitis B among Chinese migrants.</p> <p><b>Location:</b> Rotterdam, Netherlands</p>                                                                                                                                              | <p><b>Community level</b><br/><b>Educational</b></p> <p><b>Strategies/Activities:</b> Disease awareness activities including free HBV testing at outreach locations. Chronic HBV referred to treatment.</p>                  | <p><b>Length:</b> 1 year</p> <p><b>Design/Method:</b> Intervention with pre and post-survey.</p> <p><b>Measures:</b> Knowledge of HBV and prevalence of chronic HBV.</p> <p><b>Participants:</b> Chinese community</p> <p><b>Recruitment:</b> Outreach through community-based organizations.</p> <p><b>Age:</b> &gt;18 years</p> <p><b>Ethics approval:</b> NR</p>                                                                    | <p><b>Sample:</b> n= 1090</p> <p><b>Response:</b> NA</p>                                                                                    | <ul style="list-style-type: none"> <li>• 8.5% diagnosed with chronic HBV infection.</li> <li>• Level of knowledge increased significantly from 36% to 49% post-campaign among participants with low education (p=0.005).</li> </ul>                                                                                                                                                                                                         |
